# 1 **Single Cell Transcriptional Signatures of the Human Placenta in Term** 2 **and Preterm Parturition**

3 Roger Pique-Regi<sup>1,2,3,\*</sup>, Roberto Romero<sup>1,3-6,\*</sup>, Adi L.Tarca<sup>2,3,7</sup>, Edward D. Sandler<sup>1</sup>, Yi Xu<sup>2,3</sup>,  
4 Valeria Garcia-Flores<sup>2,3</sup>, Yaozhu Leng<sup>2,3</sup>, Francesca Luca<sup>1,2</sup>, Sonia S. Hassan<sup>2,3,8</sup>,  
5 Nardhy Gomez-Lopez<sup>2,3,9,\*</sup>

6 1) Center for Molecular Medicine and Genetics, Wayne State University, Detroit, Michigan, USA

7 2) Department of Obstetrics and Gynecology, Wayne State University School of Medicine,  
8 Detroit, Michigan, USA

9 3) Perinatology Research Branch, Division of Obstetrics and Maternal-Fetal Medicine, Division  
10 of Intramural Research, *Eunice Kennedy Shriver* National Institute of Child Health and Human  
11 Development, National Institutes of Health, U.S. Department of Health and Human Services  
12 (NICHD/NIH/DHHS), Bethesda, Maryland, and Detroit, Michigan, USA

13 4) Department of Obstetrics and Gynecology, University of Michigan, Ann Arbor, Michigan, USA

14 5) Department of Epidemiology and Biostatistics, Michigan State University, East Lansing,  
15 Michigan, USA

16 6) Detroit Medical Center, Detroit, Michigan, USA

17 7) Department of Computer Science, Wayne State University, College of Engineering, Detroit,  
18 Michigan, USA

19 8) Department of Physiology, Wayne State University School of Medicine, Detroit, Michigan,  
20 USA

21 9) Department of Immunology, Microbiology, and Biochemistry, Wayne State University School  
22 of Medicine, Detroit, Michigan, USA

1 \*Corresponding authors: [rpique@wayne.edu](mailto:rpique@wayne.edu); [prbchiefstaff@med.wayne.edu](mailto:prbchiefstaff@med.wayne.edu); [nardhy.gomez-](mailto:nardhy.gomez-lopez@wayne.edu)  
2 [lopez@wayne.edu](mailto:lopez@wayne.edu)

3

4 **Disclosure:** The authors report no conflicts of interest.

5

6 **Funding:** This research was supported, in part, by the Perinatology Research Branch, Division of  
7 Obstetrics and Maternal-Fetal Medicine, Division of Intramural Research, *Eunice Kennedy Shriver*  
8 National Institute of Child Health and Human Development, National Institutes of Health, U.S.  
9 Department of Health and Human Services (NICHD/NIH/DHHS); and, in part, with Federal funds  
10 from NICHD/NIH/DHHS under Contract No. HHSN275201300006C. N. G-L is also supported  
11 by the Wayne State University Perinatal Initiative in Maternal, Perinatal and Child Health.  
12 Dr. Romero has contributed to this work as part of his official duties as an employee of the United  
13 States Federal Government.

14

## 1 **Abstract**

2 More than 135 million births occur each year; yet, the molecular underpinnings of human  
3 parturition in gestational tissues, and in particular the placenta, are still poorly understood. The  
4 placenta is a complex heterogeneous organ including cells of both maternal and fetal origin, and  
5 insults that disrupt the maternal-fetal dialogue could result in adverse pregnancy outcomes such as  
6 preterm birth. There is limited knowledge of the cell type composition and transcriptional activity  
7 of the placenta and its compartments during physiologic and pathologic parturition. To fill this  
8 knowledge gap, we used scRNA-seq to profile the placental villous tree, basal plate, and  
9 chorioamniotic membranes of women with or without labor at term and those with preterm labor.  
10 Significant differences in cell type composition and transcriptional profiles were found among  
11 placental compartments and across study groups. For the first time, two cell types were identified:  
12 1) lymphatic endothelial decidual cells in the chorioamniotic membranes, and 2) non-proliferative  
13 interstitial cytotrophoblasts in the placental villi. Maternal macrophages from the chorioamniotic  
14 membranes displayed the largest differences in gene expression (e.g. NFKB1) in both processes  
15 of labor; yet, specific gene expression changes were also detected in preterm labor. Importantly,  
16 several placental scRNA-seq transcriptional signatures were modulated with advancing gestation  
17 in the maternal circulation, and specific immune cell type signatures were increased with labor at  
18 term (NK-cell and activated T-cell) and with preterm labor (macrophage, monocyte, and activated  
19 T-cell). Herein, we provide a catalogue of cell types and transcriptional profiles in the human  
20 placenta, shedding light on the molecular underpinnings and non-invasive prediction of the  
21 physiologic and pathologic parturition.

1 **One sentence summary:** The common molecular pathway of parturition for both term  
2 and preterm spontaneous labor is characterized using single cell gene expression analysis of the  
3 human placenta.

## 4 5 **Main text**

6 Parturition is essential for the reproductive success of viviparous species<sup>1</sup>; yet, the mechanisms  
7 responsible for the onset of labor remain to be elucidated<sup>2,3</sup>. Understanding human parturition is  
8 essential to tackle the challenge of prematurity, which affects 15 million neonates every year<sup>4-6</sup>.  
9 Bulk transcriptomic studies of the cervix<sup>7-11</sup>, myometrium<sup>12-17</sup>, and chorioamniotic membranes<sup>18-</sup>  
10 <sup>20</sup> revealed that labor is a state of physiological inflammation; however, finding specific pathways  
11 implicated in preterm labor still remains an elusive goal. A possible explanation is that gestational  
12 tissues, and especially the placenta, are heterogeneous composites of multiple cell types, and  
13 elucidating perturbations in the maternal-fetal dialogue requires dissection of the transcriptional  
14 activity at the cell type level, which is not possible using bulk analyses. Recent microfluidic and  
15 droplet-based technological advances have enabled characterization of gene expression at single-  
16 cell resolution (scRNA-seq)<sup>21,22</sup>. Previous work in humans<sup>23-25</sup> and mice<sup>26</sup> demonstrated that  
17 scRNA-seq can capture the multiple cell types that constitute the placenta and identify their  
18 maternal or fetal origin. Such studies showed that single-cell technology can be used to infer  
19 communication networks across the different cell types at the maternal-fetal interface<sup>25</sup>. Further,  
20 the single-cell-derived placental signatures were detected in the cell-free RNA present in maternal  
21 circulation<sup>23</sup>, suggesting that non-invasive identification of women with early-onset preeclampsia  
22 is feasible. However, these studies included a limited number of samples and did not account for  
23 the fact that different pathologies can arise from dysfunction in different placental compartments.

1 In addition, the physiologic and pathologic processes of labor have never been studied at single-  
2 cell resolution.

3 In this study, a total of 25 scRNA-seq libraries were prepared from three placental compartments:  
4 basal plate (BP), placental villous (PV), and chorioamniotic membranes (CAM) (Figure 1A).  
5 These were collected from 9 women in the following study groups: term no labor (TNL), term in  
6 labor (TIL), and preterm labor (PTL). scRNA-seq libraries were prepared with the 10X Chromium  
7 system and were processed using the 10X Cell Ranger software, resulting in 79,906 cells being  
8 captured and profiled across all samples (Table S1). We used Seurat<sup>27</sup> to normalize expression  
9 profiles and identified 19 distinct clusters, which were assigned to cell types based on the  
10 expression of previously reported marker genes<sup>23-25</sup> (see Methods, Figure S1 and Table S2-3). The  
11 uniform manifold approximation and projection (UMAP<sup>28</sup>) was used to display these clusters in  
12 two dimensions (Figure 1B). With this approach, the local and global topological structure of the  
13 clusters is preserved, with subtypes of the major cell lineages (trophoblast, lymphoid, myeloid,  
14 stromal, and endothelial sub-clusters) being displayed proximal to each other. The trophoblast  
15 lineage shown in Figure 1B recapitulates the differentiation structure previously reported<sup>23,25</sup>, such  
16 as the progression from cytotrophoblasts to either extravillous trophoblasts or syncytiotrophoblasts  
17 (Figure S2).

18  
19 The magnitude of cell type composition differences across placental compartments was substantial  
20 (Figure 1C); yet, significant changes among study groups were also noted (Figure 1D).  
21 Extravillous trophoblasts (EVT) were present in all three compartments, while cytotrophoblasts  
22 (CTB) were especially pervasive in the placental villi. Non-proliferative interstitial  
23 cytotrophoblasts (npiCTB) were identified for the first time in the placental villi as forming a

1 distinct cluster. Compared to conventional cytotrophoblasts, npICTBs have a higher expression of  
2 PAGE4, but a reduced expression of genes involved in cell proliferation such as XIST, DDX3X,  
3 and EIF1AX (Figure S3).

4  
5 In terms of immune cell types, the chorioamniotic membranes largely contained lymphoid and  
6 myeloid cells of maternal origin, including T cells (mostly in a resting state), NK cells, and  
7 macrophages (Figure 1C, 1E and Figure S4). In contrast, the basal plate included immune cells of  
8 both maternal and fetal origin, such as T cells (mostly in an active state), NK cells, and  
9 macrophages. The placental villi contained more fetal than maternal immune cells, namely  
10 monocytes, macrophages, T cells, and NK cells. Two macrophage subsets were found in placenta  
11 compartments: macrophage 1 of maternal origin that was predominant in the chorioamniotic  
12 membranes, and macrophage 2 of fetal origin that was mainly present in the basal plate and  
13 placental villi.

14  
15 Importantly, a new lymphatic endothelial decidual (LED) cell type of maternal origin was  
16 identified in the chorioamniotic membranes, forming a distinct transcriptional cluster that was  
17 separate from other endothelial cell-types (Figure 1C). LED cells were rarely observed in the basal  
18 plate and were completely absent in the placental villous (Figure 1D). The signature genes of this  
19 novel cell type were enriched for pathways involving cell surface interactions at the vascular wall,  
20 extracellular matrix organization (Figure S5), tight junction, and focal adhesion (Figure S6).  
21 Immunostaining confirmed the co-expression of LYVE1 (lymphatic marker) and CD31  
22 (endothelial molecule marker) in the vessels of the chorioamniotic membranes, but not in the basal  
23 plate or placenta (Figure 2A). The co-expression of LYVE1 and CD31 (i.e. LED cells) in the

1 chorioamniotic membranes is shown in Figure 2B and Video S1. LYVE1 was also expressed by  
2 the fetal macrophages present in the placental villi and basal plate (Figure 2C), yet was only  
3 visualized by immunostaining in immune cells located in the villous tree (Figure 2A). Other genes  
4 highly expressed by LED cells were CD34, CDH5, EDNRB, PDPN, and TIE1 (Figure 2C, S7).  
5 This finding conclusively shows the presence of lymphatic vessels in the decidua parietalis of the  
6 chorioamniotic membranes, providing a major route for maternal T cells infiltrating the maternal-  
7 fetal interface<sup>29</sup>.

8  
9 For cell types that were present in more than one placental compartment, major differences in gene  
10 expression were identified across locations, indicative of further specialization of cells depending  
11 on the unique physiological functions of each microenvironment (Figure S8 and Table S4).  
12 Differences in the transcriptional profiles were particularly large for maternal macrophages as well  
13 as EVT, NK cells, and T cells in the chorioamniotic membranes compared to the other  
14 compartments. Genes differentially expressed in the chorioamniotic membranes were enriched for  
15 interleukin, Toll-like receptor, and the NF- $\kappa$ B and TNF signaling pathways (Figure S9-S11). These  
16 results are consistent with previous reports showing a role for these mediators in the inflammatory  
17 process of labor<sup>30-51</sup>. Conversely, the placental villous and basal plate were more similar to each  
18 other, with most differentially expressed genes (DEG) between these compartments being noted  
19 in fibroblasts (335 DEG,  $q < 0.1$  and fold change  $> 2$ ) (Figure S8, S12-S17). DEGs in the placental  
20 villous fibroblasts showed enrichment in smooth muscle contraction, apelin and oxytocin signaling  
21 pathways (Figure S16); while DEGs in CAM fibroblasts were enriched in elastic fiber formation  
22 and extracellular matrix pathways (Figure S9).

23

1 Next, we assessed changes due to term and preterm labor in each cell type (Table S5). The largest  
2 number of DEGs between the term labor and term no labor groups were observed in the maternal  
3 macrophages (macrophage 1), followed by the EVT (144 and 37, respectively,  $q < 0.1$ ; Figure 3A).  
4 The largest number of DEGs between the preterm labor and term labor groups were observed in  
5 EVT and CTB (37 and 33, respectively,  $q < 0.1$ ; Figure 3A). Figure 3B displays the gene expression  
6 changes between TIL and TNL or PTL and TNL that are shared between the two labor groups,  
7 representing the common pathway of parturition (defined as the anatomical, physiological,  
8 biochemical, endocrinological, immunological, and clinical events that occur in the mother and/or  
9 fetus in both term and preterm labor<sup>52</sup>). Non-shared differences in gene expression with labor at  
10 term and in preterm labor were mostly observed in trophoblast cell types such as CTB and EVT  
11 as well as in stromal cells (Figure 3C). Some of these changes may be explained by the unavoidable  
12 confounding effect of gestational age since placentas from women without labor in preterm  
13 gestation cannot be obtained in the absence of pregnancy complications. Specifically, the  
14 expression of NFKB1 by maternal macrophages was higher in labor at term compared to TNL,  
15 and this increase was further accentuated in preterm labor (Figure 3D). Consistently with the  
16 induction of the NF $\kappa$ B pathway, the labor-associated DEGs in macrophages involved biological  
17 processes such as activation of immune response and regulation of cytokine production (Figure  
18 S18A). When comparing the effect sizes between the PTL/TNL and TIL/TNL juxtapositions on  
19 the same gene and cell type, positive correlations were observed for most of the placental cell types  
20 (Figure 3E). Genes displaying differential effects in term and preterm labor are mostly found in  
21 trophoblast cell types (see off-diagonal points in the scatter plot), which may be explained by the  
22 phenomenon of gene expression decoherence<sup>53</sup>. This lack of proper correlation between  
23 biomarkers to their expected normal relationships is commonly found in pathological conditions.



1 Lastly, in EVT the DEGs with labor were enriched for genes implicated in cellular response to  
2 stress, including the WNT and NOTCH pathways, as well as cell cycle checkpoints (Figure S18B),  
3 further supporting the hypothesis that the cellular senescence pathway (i.e. cell cycle arrest)  
4 implicated in the physiologic<sup>54,55</sup> and pathologic<sup>56,57</sup> processes of labor.

5  
6 To demonstrate the translational value of single-cell RNA signatures derived from the placenta,  
7 we conducted an *in silico* analysis in public datasets<sup>58,59</sup> to test whether the single-cell signatures  
8 could be non-invasively monitored in the maternal circulation throughout gestation (Figure 4A).  
9 Previous studies have correlated bulk mRNA expression in the maternal circulation with  
10 gestational age at blood draw<sup>58,60</sup>, risk for preterm birth<sup>59,61-63</sup>, or both<sup>64,65</sup>. First, we showed that  
11 the single-cell signatures of macrophages, monocytes, NK cells, T cells, npICTB, and fibroblasts  
12 are modulated throughout gestation in the maternal circulation (Figure 4B-C, S19A). These results  
13 validate the T-cell and monocyte signature changes with gestational age that were previously  
14 reported<sup>23,58</sup>; yet, here we show that novel placental single-cell signatures (e.g., npICTB and  
15 fibroblast) can also be non-invasively monitored in maternal circulation (Figure S19A). In  
16 addition, for the first time, we report that the single-cell-derived NK-cell and activated T-cell  
17 signatures were upregulated in women with spontaneous labor at term compared to gestational-  
18 age matched controls without labor (Figure 4D). Importantly, at 24-34 weeks of gestation, we  
19 found that the single cell signatures of macrophages, monocytes, activated T cells, and fibroblasts  
20 were increased in the circulation of women with preterm labor and delivery compared to  
21 gestational age-matched controls (Figure 4E and S19B). These findings are in line with previous  
22 reports indicating a role for these immune cell-types in the pathophysiology of preterm labor<sup>29,66-</sup>  
23 <sup>68</sup>.

1  
2  
3  
4  
5  
6  
7  
8  
9  
10  
11  
12  
13  
14  
15  
16

In summary, this study provides evidence of differences in cell type composition and transcriptional profiles among the basal plate, placental villi, and chorioamniotic membranes, as well as between the pathologic and physiologic processes of labor at single-cell resolution. Using scRNAseq technology, two novel cell types were identified in the chorioamniotic membranes and placental villi. In addition, we showed that maternal macrophages and extravillous trophoblasts are the cell types with the most transcriptional changes during the processes of labor. Lastly, we report that maternal and fetal transcriptional signatures derived from placental scRNA-seq are modulated with advancing gestation and are markedly perturbed with term and preterm labor in the maternal circulation. These results highlight the potential of single-cell signatures as biomarkers to non-invasively monitor the cellular dynamics during pregnancy and to predict obstetrical disease. The current study represents the most comprehensive single-cell analysis of the human placental transcriptome in physiologic and pathologic parturition; yet, additional studies are needed to characterize the different etiologies of the preterm labor syndrome.

## 1 References and Notes

- 2 1 Romero, R., Tarca, A. L. & Tromp, G. Insights into the physiology of childbirth using  
3 transcriptomics. *PLoS Med* **3**, e276, doi:10.1371/journal.pmed.0030276 (2006).
- 4 2 Norwitz, E. R., Robinson, J. N. & Challis, J. R. The control of labor. *N Engl J Med* **341**,  
5 660-666, doi:10.1056/NEJM199908263410906 (1999).
- 6 3 Norwitz, E. R. *et al.* Molecular Regulation of Parturition: The Role of the Decidual Clock.  
7 *Cold Spring Harb Perspect Med* **5**, doi:10.1101/cshperspect.a023143 (2015).
- 8 4 Muglia, L. J. & Katz, M. The enigma of spontaneous preterm birth. *N Engl J Med* **362**,  
9 529-535, doi:10.1056/NEJMra0904308 (2010).
- 10 5 Blencowe, H. *et al.* National, regional, and worldwide estimates of preterm birth rates in  
11 the year 2010 with time trends since 1990 for selected countries: a systematic analysis  
12 and implications. *Lancet* **379**, 2162-2172, doi:10.1016/S0140-6736(12)60820-4 (2012).
- 13 6 Romero, R., Dey, S. K. & Fisher, S. J. Preterm labor: one syndrome, many causes.  
14 *Science* **345**, 760-765, doi:10.1126/science.1251816 (2014).
- 15 7 Hassan, S. S. *et al.* The transcriptome of the uterine cervix before and after spontaneous  
16 term parturition. *Am J Obstet Gynecol* **195**, 778-786, doi:10.1016/j.ajog.2006.06.021  
17 (2006).
- 18 8 Hassan, S. S. *et al.* Signature pathways identified from gene expression profiles in the  
19 human uterine cervix before and after spontaneous term parturition. *Am J Obstet*  
20 *Gynecol* **197**, 250 e251-257, doi:10.1016/j.ajog.2007.07.008 (2007).
- 21 9 Hassan, S. S. *et al.* The transcriptome of cervical ripening in human pregnancy before  
22 the onset of labor at term: identification of novel molecular functions involved in this  
23 process. *J Matern Fetal Neonatal Med* **22**, 1183-1193, doi:10.3109/14767050903353216  
24 (2009).
- 25 10 Bollapragada, S. *et al.* Term labor is associated with a core inflammatory response in  
26 human fetal membranes, myometrium, and cervix. *Am J Obstet Gynecol* **200**, 104 e101-  
27 111, doi:10.1016/j.ajog.2008.08.032 (2009).
- 28 11 Dobyns, A. E. *et al.* Macrophage gene expression associated with remodeling of the  
29 prepartum rat cervix: microarray and pathway analyses. *PLoS One* **10**, e0119782,  
30 doi:10.1371/journal.pone.0119782 (2015).
- 31 12 Charpigny, G. *et al.* A functional genomic study to identify differential gene expression in  
32 the preterm and term human myometrium. *Biol Reprod* **68**, 2289-2296,  
33 doi:10.1095/biolreprod.102.013763 (2003).
- 34 13 Romero, R. *et al.* Transcriptome interrogation of human myometrium identifies  
35 differentially expressed sense-antisense pairs of protein-coding and long non-coding  
36 RNA genes in spontaneous labor at term. *J Matern Fetal Neonatal Med* **27**, 1397-1408,  
37 doi:10.3109/14767058.2013.860963 (2014).
- 38 14 Mittal, P. *et al.* Characterization of the myometrial transcriptome and biological pathways  
39 of spontaneous human labor at term. *J Perinat Med* **38**, 617-643,  
40 doi:10.1515/JPM.2010.097 (2010).
- 41 15 Mittal, P. *et al.* A molecular signature of an arrest of descent in human parturition. *Am J*  
42 *Obstet Gynecol* **204**, 177 e115-133, doi:10.1016/j.ajog.2010.09.025 (2011).
- 43 16 Chan, Y. W., van den Berg, H. A., Moore, J. D., Quenby, S. & Blanks, A. M. Assessment  
44 of myometrial transcriptome changes associated with spontaneous human labour by  
45 high-throughput RNA-seq. *Exp Physiol* **99**, 510-524,  
46 doi:10.1113/expphysiol.2013.072868 (2014).
- 47 17 Stanfield, Z. *et al.* Myometrial Transcriptional Signatures of Human Parturition. *Front*  
48 *Genet* **10**, 185, doi:10.3389/fgene.2019.00185 (2019).

- 1 18 Haddad, R. *et al.* Human spontaneous labor without histologic chorioamnionitis is  
2 characterized by an acute inflammation gene expression signature. *Am J Obstet*  
3 *Gynecol* **195**, 394 e391-324, doi:10.1016/j.ajog.2005.08.057 (2006).
- 4 19 Mittal, P. *et al.* Fetal membranes as an interface between inflammation and metabolism:  
5 increased aquaporin 9 expression in the presence of spontaneous labor at term and  
6 chorioamnionitis. *J Matern Fetal Neonatal Med* **22**, 1167-1175,  
7 doi:10.3109/14767050903019692 (2009).
- 8 20 Nhan-Chang, C. L. *et al.* Characterization of the transcriptome of chorioamniotic  
9 membranes at the site of rupture in spontaneous labor at term. *Am J Obstet Gynecol*  
10 **202**, 462 e461-441, doi:10.1016/j.ajog.2010.02.045 (2010).
- 11 21 Klein, A. M. *et al.* Droplet barcoding for single-cell transcriptomics applied to embryonic  
12 stem cells. *Cell* **161**, 1187-1201, doi:10.1016/j.cell.2015.04.044 (2015).
- 13 22 Macosko, E. Z. *et al.* Highly Parallel Genome-wide Expression Profiling of Individual  
14 Cells Using Nanoliter Droplets. *Cell* **161**, 1202-1214, doi:10.1016/j.cell.2015.05.002  
15 (2015).
- 16 23 Tsang, J. C. H. *et al.* Integrative single-cell and cell-free plasma RNA transcriptomics  
17 elucidates placental cellular dynamics. *Proc Natl Acad Sci U S A* **114**, E7786-E7795,  
18 doi:10.1073/pnas.1710470114 (2017).
- 19 24 Pavlicev, M. *et al.* Single-cell transcriptomics of the human placenta: inferring the cell  
20 communication network of the maternal-fetal interface. *Genome Res* **27**, 349-361,  
21 doi:10.1101/gr.207597.116 (2017).
- 22 25 Vento-Tormo, R. *et al.* Single-cell reconstruction of the early maternal-fetal interface in  
23 humans. *Nature* **563**, 347-353, doi:10.1038/s41586-018-0698-6 (2018).
- 24 26 Nelson, A. C., Mould, A. W., Bikoff, E. K. & Robertson, E. J. Single-cell RNA-seq reveals  
25 cell type-specific transcriptional signatures at the maternal-foetal interface during  
26 pregnancy. *Nat Commun* **7**, 11414, doi:10.1038/ncomms11414 (2016).
- 27 27 Butler, A., Hoffman, P., Smibert, P., Papalexi, E. & Satija, R. Integrating single-cell  
28 transcriptomic data across different conditions, technologies, and species. *Nat*  
29 *Biotechnol* **36**, 411-420, doi:10.1038/nbt.4096 (2018).
- 30 28 Becht, E. *et al.* Dimensionality reduction for visualizing single-cell data using UMAP. *Nat*  
31 *Biotechnol*, doi:10.1038/nbt.4314 (2018).
- 32 29 Arenas-Hernandez, M. *et al.* Effector and Activated T Cells Induce Preterm Labor and  
33 Birth That Is Prevented by Treatment with Progesterone. *Journal of immunology*  
34 *(Baltimore, Md. : 1950)* **202**, 2585-2608, doi:10.4049/jimmunol.1801350 (2019).
- 35 30 Romero, R. *et al.* Infection and labor. III. Interleukin-1: a signal for the onset of  
36 parturition. *Am J Obstet Gynecol* **160**, 1117-1123 (1989).
- 37 31 Romero, R. *et al.* Amniotic fluid interleukin-1 in spontaneous labor at term. *The Journal*  
38 *of reproductive medicine* **35**, 235-238 (1990).
- 39 32 Romero, R. *et al.* Interleukin-1 alpha and interleukin-1 beta in preterm and term human  
40 parturition. *American journal of reproductive immunology (New York, N.Y. : 1989)* **27**,  
41 117-123 (1992).
- 42 33 Romero, R., Avila, C., Santhanam, U. & Sehgal, P. B. Amniotic fluid interleukin 6 in  
43 preterm labor. Association with infection. *The Journal of clinical investigation* **85**, 1392-  
44 1400, doi:10.1172/jci114583 (1990).
- 45 34 Santhanam, U. *et al.* Cytokines in normal and abnormal parturition: elevated amniotic  
46 fluid interleukin-6 levels in women with premature rupture of membranes associated with  
47 intrauterine infection. *Cytokine* **3**, 155-163 (1991).
- 48 35 Romero, R. *et al.* Amniotic fluid interleukin-6 determinations are of diagnostic and  
49 prognostic value in preterm labor. *American journal of reproductive immunology (New*  
50 *York, N.Y. : 1989)* **30**, 167-183 (1993).

- 1 36 Romero, R. *et al.* Neutrophil attractant/activating peptide-1/interleukin-8 in term and  
2 preterm parturition. *Am J Obstet Gynecol* **165**, 813-820 (1991).
- 3 37 Hsu, C. D., Meaddough, E., Aversa, K. & Copel, J. A. The role of amniotic fluid L-  
4 selectin, GRO-alpha, and interleukin-8 in the pathogenesis of intraamniotic infection. *Am*  
5 *J Obstet Gynecol* **178**, 428-432 (1998).
- 6 38 Keelan, J. A. *et al.* Cytokine abundance in placental tissues: evidence of inflammatory  
7 activation in gestational membranes with term and preterm parturition. *Am J Obstet*  
8 *Gynecol* **181**, 1530-1536 (1999).
- 9 39 Young, A. *et al.* Immunolocalization of proinflammatory cytokines in myometrium, cervix,  
10 and fetal membranes during human parturition at term. *Biol Reprod* **66**, 445-449 (2002).
- 11 40 Osman, I. *et al.* Leukocyte density and pro-inflammatory cytokine expression in human  
12 fetal membranes, decidua, cervix and myometrium before and during labour at term. *Mol*  
13 *Hum Reprod* **9**, 41-45 (2003).
- 14 41 Kim, Y. M. *et al.* Toll-like receptor-2 and -4 in the chorioamniotic membranes in  
15 spontaneous labor at term and in preterm parturition that are associated with  
16 chorioamnionitis. *Am J Obstet Gynecol* **191**, 1346-1355, doi:10.1016/j.ajog.2004.07.009  
17 (2004).
- 18 42 Abrahams, V. M. *et al.* Divergent trophoblast responses to bacterial products mediated  
19 by TLRs. *Journal of immunology (Baltimore, Md. : 1950)* **173**, 4286-4296 (2004).
- 20 43 Kumazaki, K., Nakayama, M., Yanagihara, I., Suehara, N. & Wada, Y.  
21 Immunohistochemical distribution of Toll-like receptor 4 in term and preterm human  
22 placentas from normal and complicated pregnancy including chorioamnionitis. *Hum*  
23 *Pathol* **35**, 47-54 (2004).
- 24 44 Koga, K. *et al.* Activation of TLR3 in the trophoblast is associated with preterm delivery.  
25 *American journal of reproductive immunology (New York, N.Y. : 1989)* **61**, 196-212,  
26 doi:10.1111/j.1600-0897.2008.00682.x (2009).
- 27 45 Belt, A. R., Baldassare, J. J., Molnar, M., Romero, R. & Hertelendy, F. The nuclear  
28 transcription factor NF-kappaB mediates interleukin-1beta-induced expression of  
29 cyclooxygenase-2 in human myometrial cells. *Am J Obstet Gynecol* **181**, 359-366  
30 (1999).
- 31 46 Yan, X., Sun, M. & Gibb, W. Localization of nuclear factor-kappa B (NF kappa B) and  
32 inhibitory factor-kappa B (I kappa B) in human fetal membranes and decidua at term and  
33 preterm delivery. *Placenta* **23**, 288-293, doi:10.1053/plac.2002.0789 (2002).
- 34 47 Lindstrom, T. M. & Bennett, P. R. The role of nuclear factor kappa B in human labour.  
35 *Reproduction* **130**, 569-581, doi:10.1530/rep.1.00197 (2005).
- 36 48 Vora, S. *et al.* Nuclear factor-kappa B localization and function within intrauterine tissues  
37 from term and preterm labor and cultured fetal membranes. *Reprod Biol Endocrinol* **8**, 8,  
38 doi:10.1186/1477-7827-8-8 (2010).
- 39 49 Romero, R. *et al.* Infection and labor. IV. Cachectin-tumor necrosis factor in the amniotic  
40 fluid of women with intraamniotic infection and preterm labor. *Am J Obstet Gynecol* **161**,  
41 336-341 (1989).
- 42 50 Romero, R. *et al.* Tumor necrosis factor in preterm and term labor. *Am J Obstet Gynecol*  
43 **166**, 1576-1587 (1992).
- 44 51 Lonergan, M. *et al.* Tumor necrosis factor-related apoptosis-inducing ligand (TRAIL),  
45 TRAIL receptors, and the soluble receptor osteoprotegerin in human gestational  
46 membranes and amniotic fluid during pregnancy and labor at term and preterm. *J Clin*  
47 *Endocrinol Metab* **88**, 3835-3844, doi:10.1210/jc.2002-021905 (2003).
- 48 52 Romero, R. *et al.* The preterm parturition syndrome. *BJOG* **113 Suppl 3**, 17-42,  
49 doi:10.1111/j.1471-0528.2006.01120.x (2006).
- 50 53 Lea, A. *et al.* Genetic and environmental perturbations lead to regulatory decoherence.  
51 *Elife* **8**, doi:10.7554/eLife.40538 (2019).



- 1 54 Behnia, F. *et al.* Chorioamniotic membrane senescence: a signal for parturition? *Am J Obstet Gynecol* **213**, 359.e351-316, doi:10.1016/j.ajog.2015.05.041 (2015).
- 2 55 Poletini, J. *et al.* Telomere Fragment Induced Amnion Cell Senescence: A Contributor to Parturition? *PLoS One* **10**, e0137188, doi:10.1371/journal.pone.0137188 (2015).
- 3 56 Hirota, Y. *et al.* Uterine-specific p53 deficiency confers premature uterine senescence and promotes preterm birth in mice. *The Journal of clinical investigation* **120**, 803-815, doi:10.1172/JCI40051 (2010).
- 4 57 Gomez-Lopez, N. *et al.* Preterm labor in the absence of acute histologic chorioamnionitis is characterized by cellular senescence of the chorioamniotic membranes. *Am J Obstet Gynecol* **217**, 592 e591-592 e517, doi:10.1016/j.ajog.2017.08.008 (2017).
- 5 58 Tarca, A. L. *et al.* Targeted expression profiling by RNA-Seq improves detection of cellular dynamics during pregnancy and identifies a role for T cells in term parturition. *Sci Rep* **9**, 848, doi:10.1038/s41598-018-36649-w (2019).
- 6 59 Paquette, A. G. *et al.* Comparative analysis of gene expression in maternal peripheral blood and monocytes during spontaneous preterm labor. *Am J Obstet Gynecol* **218**, 345 e341-345 e330, doi:10.1016/j.ajog.2017.12.234 (2018).
- 7 60 Al-Garawi, A. *et al.* The Role of Vitamin D in the Transcriptional Program of Human Pregnancy. *PLoS One* **11**, e0163832, doi:10.1371/journal.pone.0163832 (2016).
- 8 61 Heng, Y. J., Pennell, C. E., Chua, H. N., Perkins, J. E. & Lye, S. J. Whole blood gene expression profile associated with spontaneous preterm birth in women with threatened preterm labor. *PLoS One* **9**, e96901, doi:10.1371/journal.pone.0096901 (2014).
- 9 62 Sirota, M. *et al.* Enabling precision medicine in neonatology, an integrated repository for preterm birth research. *Sci Data* **5**, 180219, doi:10.1038/sdata.2018.219 (2018).
- 10 63 Knijnenburg, T. A. *et al.* Genomic and molecular characterization of preterm birth. *Proc Natl Acad Sci U S A* **116**, 5819-5827, doi:10.1073/pnas.1716314116 (2019).
- 11 64 Heng, Y. J. *et al.* Maternal Whole Blood Gene Expression at 18 and 28 Weeks of Gestation Associated with Spontaneous Preterm Birth in Asymptomatic Women. *PLoS One* **11**, e0155191, doi:10.1371/journal.pone.0155191 (2016).
- 12 65 Ngo, T. T. M. *et al.* Noninvasive blood tests for fetal development predict gestational age and preterm delivery. *Science* **360**, 1133-1136, doi:10.1126/science.aar3819 (2018).
- 13 66 Hamilton, S. *et al.* Macrophages infiltrate the human and rat decidua during term and preterm labor: evidence that decidual inflammation precedes labor. *Biol Reprod* **86**, 39, doi:10.1095/biolreprod.111.095505 (2012).
- 14 67 Shynlova, O. *et al.* Infiltration of myeloid cells into decidua is a critical early event in the labour cascade and post-partum uterine remodelling. *J Cell Mol Med* **17**, 311-324, doi:10.1111/jcmm.12012 (2013).
- 15 68 Gomez-Lopez, N. *et al.* In vivo T-cell activation by a monoclonal alphaCD3epsilon antibody induces preterm labor and birth. *American journal of reproductive immunology (New York, N.Y. : 1989)* **76**, 386-390, doi:10.1111/aji.12562 (2016).
- 16 69 Xu, Y., Plazyo, O., Romero, R., Hassan, S. S. & Gomez-Lopez, N. Isolation of Leukocytes from the Human Maternal-fetal Interface. *J Vis Exp*, e52863, doi:10.3791/52863 (2015).
- 17 70 Dobin, A. *et al.* STAR: ultrafast universal RNA-seq aligner. *Bioinformatics* **29**, 15-21, doi:10.1093/bioinformatics/bts635 (2013).
- 18 71 Aran, D., Hu, Z. & Butte, A. J. xCell: digitally portraying the tissue cellular heterogeneity landscape. *Genome Biol* **18**, 220, doi:10.1186/s13059-017-1349-1 (2017).
- 19 72 Kang, H. M. *et al.* Multiplexed droplet single-cell RNA-sequencing using natural genetic variation. *Nat Biotechnol* **36**, 89-94, doi:10.1038/nbt.4042 (2018).
- 20 73 Love, M. I., Huber, W. & Anders, S. Moderated estimation of fold change and dispersion for RNA-seq data with DESeq2. *Genome Biol* **15**, 550, doi:10.1186/s13059-014-0550-8 (2014).
- 21

- 1 74 Yu, G., Wang, L. G., Han, Y. & He, Q. Y. clusterProfiler: an R package for comparing  
2 biological themes among gene clusters. *OMICS* **16**, 284-287,  
3 doi:10.1089/omi.2011.0118 (2012).  
4 75 Subramanian, A. *et al.* Gene set enrichment analysis: a knowledge-based approach for  
5 interpreting genome-wide expression profiles. *Proc Natl Acad Sci U S A* **102**, 15545-  
6 15550, doi:10.1073/pnas.0506580102 (2005).  
7  
8

## 1 **Data and materials availability**

2 The scRNA-seq data reported in this study is being submitted to NIH dbGAP repository (accession  
3 number phsXXXXXX pending). All other data used in this study are already available through  
4 Gene Expression Omnibus (accession identifiers GSE114037 and GSE96083). All software and  
5 R packages used herein are detailed in the Materials and Methods. Scripts detailing the analyses  
6 are also available at <https://github.com/piquelab/sclabor>. To enable further exploration of the  
7 results we have also provided a Shiny App in Rstudio available at:  
8 <http://genome.grid.wayne.edu:9091/>

9

## 10 **Supplementary Materials**

11 Materials and Methods

12 Tables S1-S6

13 Video S1

14 Figures S1-S19

15

## 16 **Figure Captions**

17 **Figure 1. Transcriptional map of the placenta in human parturition.** **A.** Study design  
18 illustrating the placental compartments and study groups. **B.** Uniform Manifold Approximation  
19 Plot (UMAP), where dots representing single-cells and colored by cell type. **C.** Distribution of  
20 single-cell clusters by placental compartments. **D.** Average proportions of cell types by  
21 placental compartments and study groups. **E.** Distribution of single-cells by maternal or fetal  
22 origin. STB, Syncytiotrophoblast; EVT, Extravillous trophoblast; CTB, cytotrophoblast; HSC,



1 hematopoietic stem cell; npiCTB, non proliferative interstitial cytotrophoblast; LED, lymphoid  
2 endothelial decidual cell

3  
4 **Figure 2. Identification of LED cells in the chorioamniotic membranes.** A. Cell  
5 segmentation map (built using the DAPI nuclear staining) and immunofluorescence detection  
6 of LYVE-1 (red) and CD31 (green) in the basal plate (BP), placental villi (PV), and  
7 chorioamniotic membranes (CAM). Red arrows point to fetal macrophages expressing LYVE1  
8 but not CD31, and green arrows indicate lymphatic endothelial decidual cells expressing both  
9 LYVE1 and CD31. B. Co-expression of LYVE1 and CD31 (i.e. LED cells) in the  
10 chorioamniotic membranes. C. Single-cell expression UMAP of LYVE-1 (red) and CD34  
11 (green) in the placental compartments.

12  
13 **Figure 3. Cell type specific expression changes in term and preterm labor.** A. Number of  
14 differentially expressed genes (DEGs) among study groups (TNL, term no labor; TIL, term in  
15 labor; PTL, preterm labor) by direction of change. Shared (B) and non-shared (C) expression  
16 changes in term labor and preterm labor relative to the term no labor group ( $q < 0.01$ ). The length  
17 of each whisker represents the 95% confidence interval. D. The expression of NFKB1 by  
18 maternal macrophages in the placental compartments (BP, basal plate; PV, placental villous;  
19 CAM, chorioamniotic membranes) and study groups. The notch represents the 95% confidence  
20 interval of the median. E. Differences and similarities in expression changes with preterm labor  
21 and term labor by three major cell types (immune, stromal/endothelial, and trophoblast cells).

22  
23 **Figure 4. Quantification of scRNA-seq signatures in maternal circulation.** A. Design of *in*

1 *silico* longitudinal study including samples throughout gestation in women who delivered at  
2 term<sup>58</sup>. **B&C**. Variation of scRNA-seq signatures in the maternal circulation with advancing  
3 gestation. **D&E**. Perturbations in scRNA-seq signatures in women with spontaneous labor at  
4 term (TIL)<sup>58</sup> or preterm labor (PTL)<sup>59</sup>. Gestational age-matched controls were included in each  
5 case (TNL, term no labor) and (GA control).

6

7

# FIGURE 1

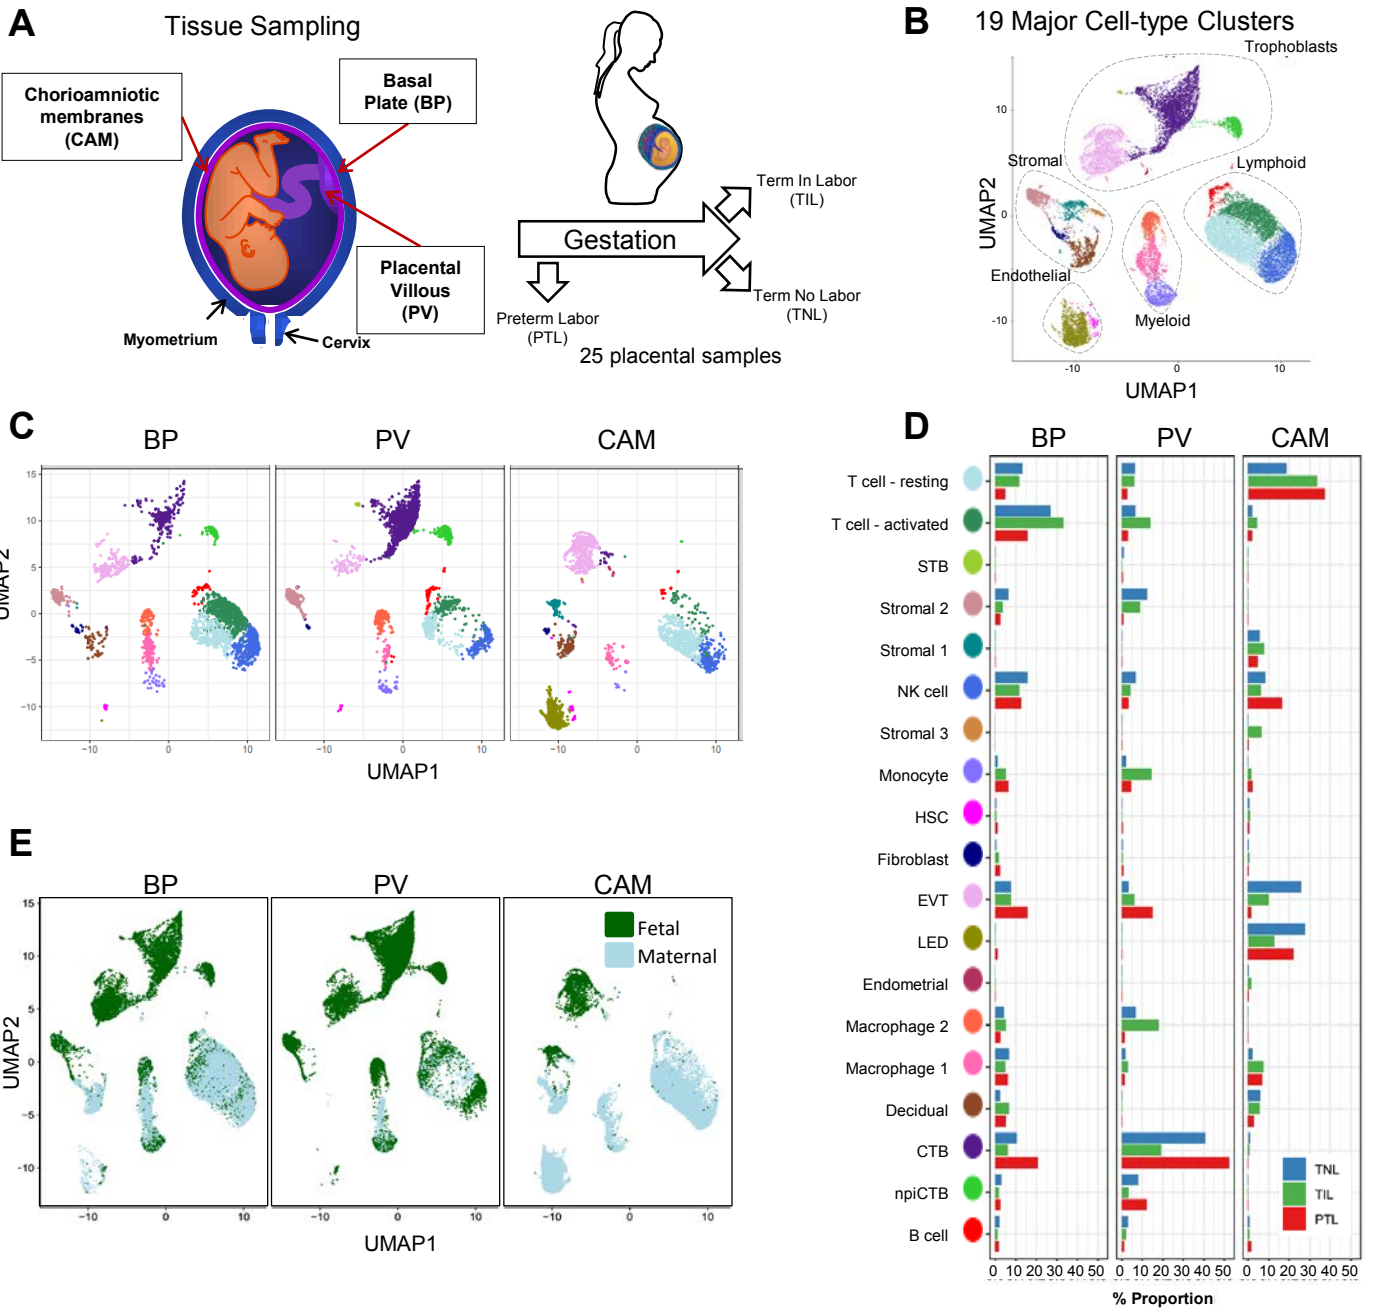

# FIGURE 2

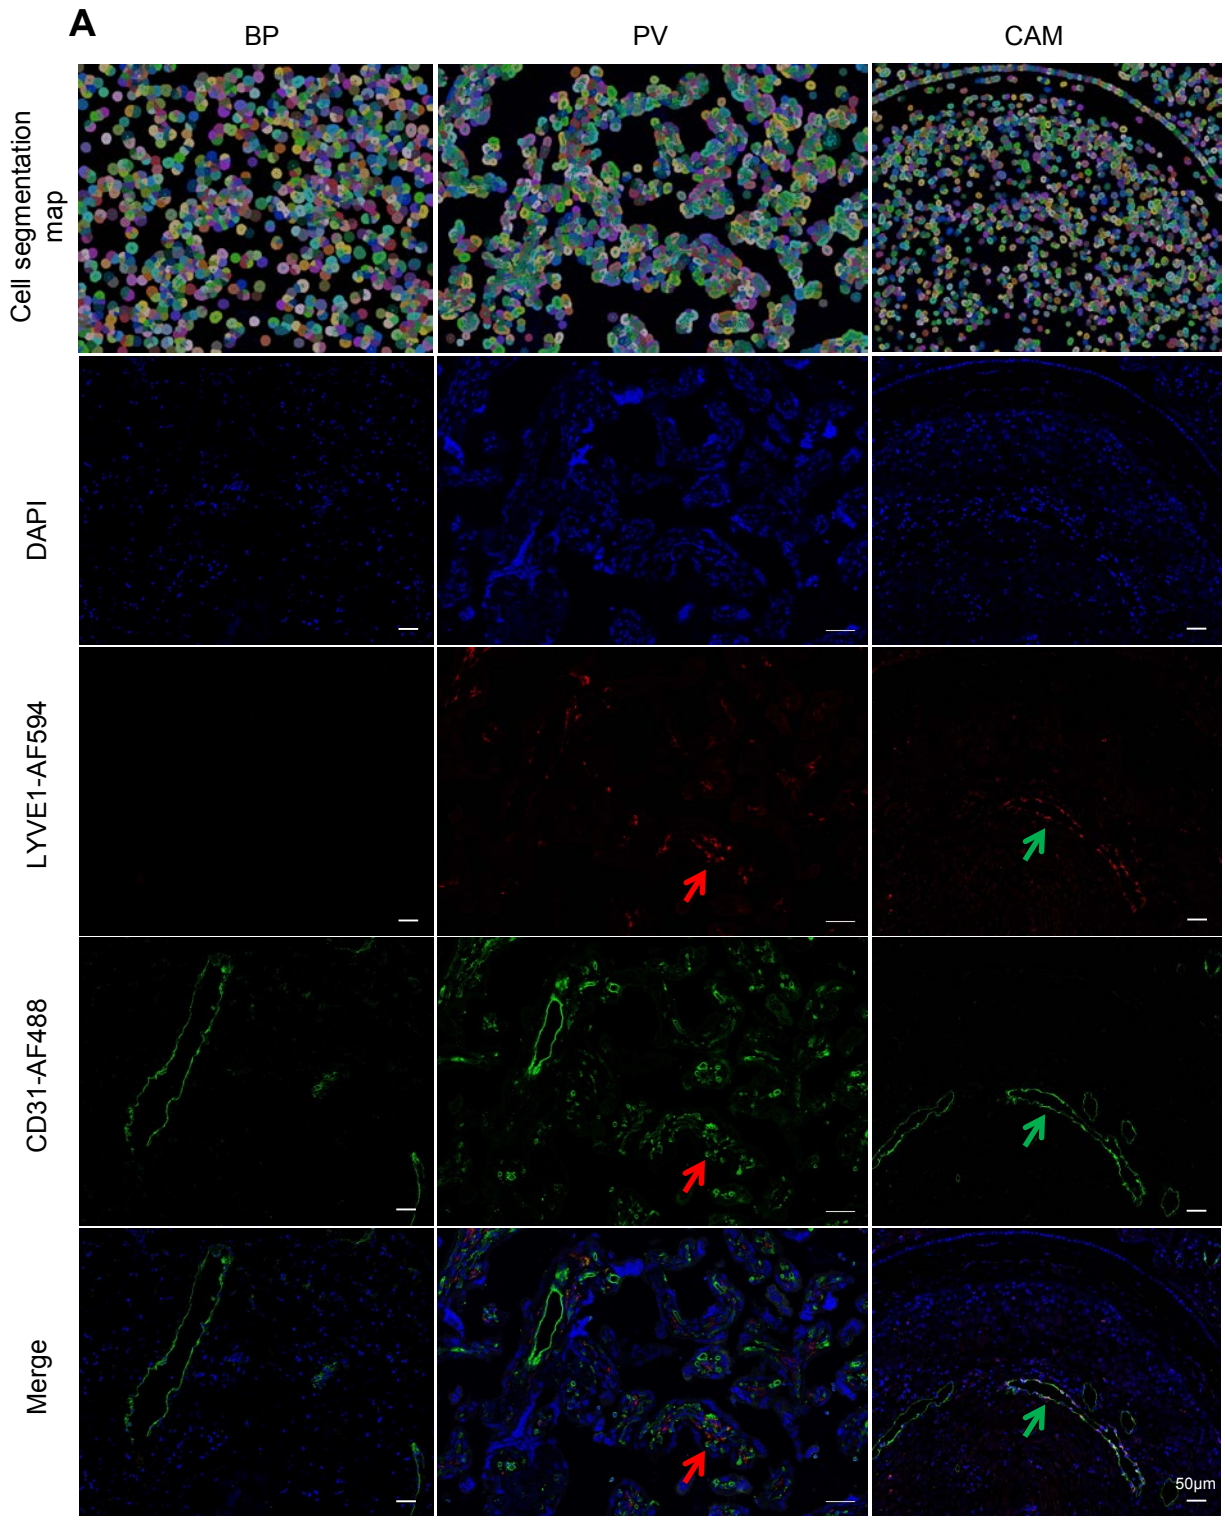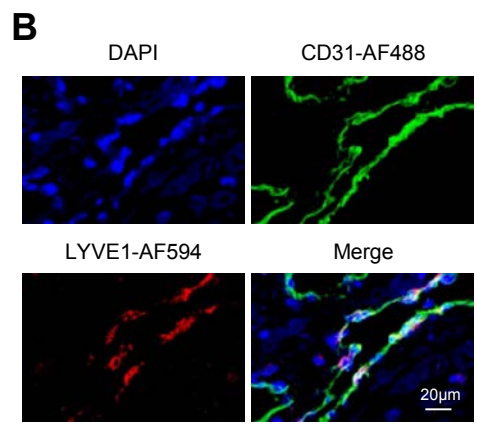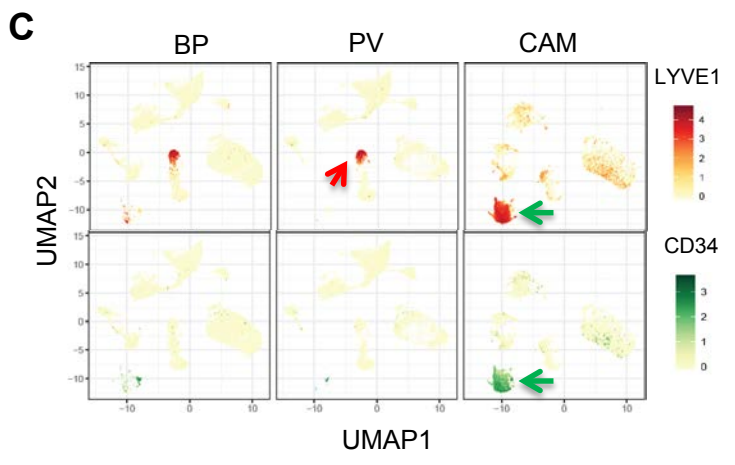

**FIGURE 3**

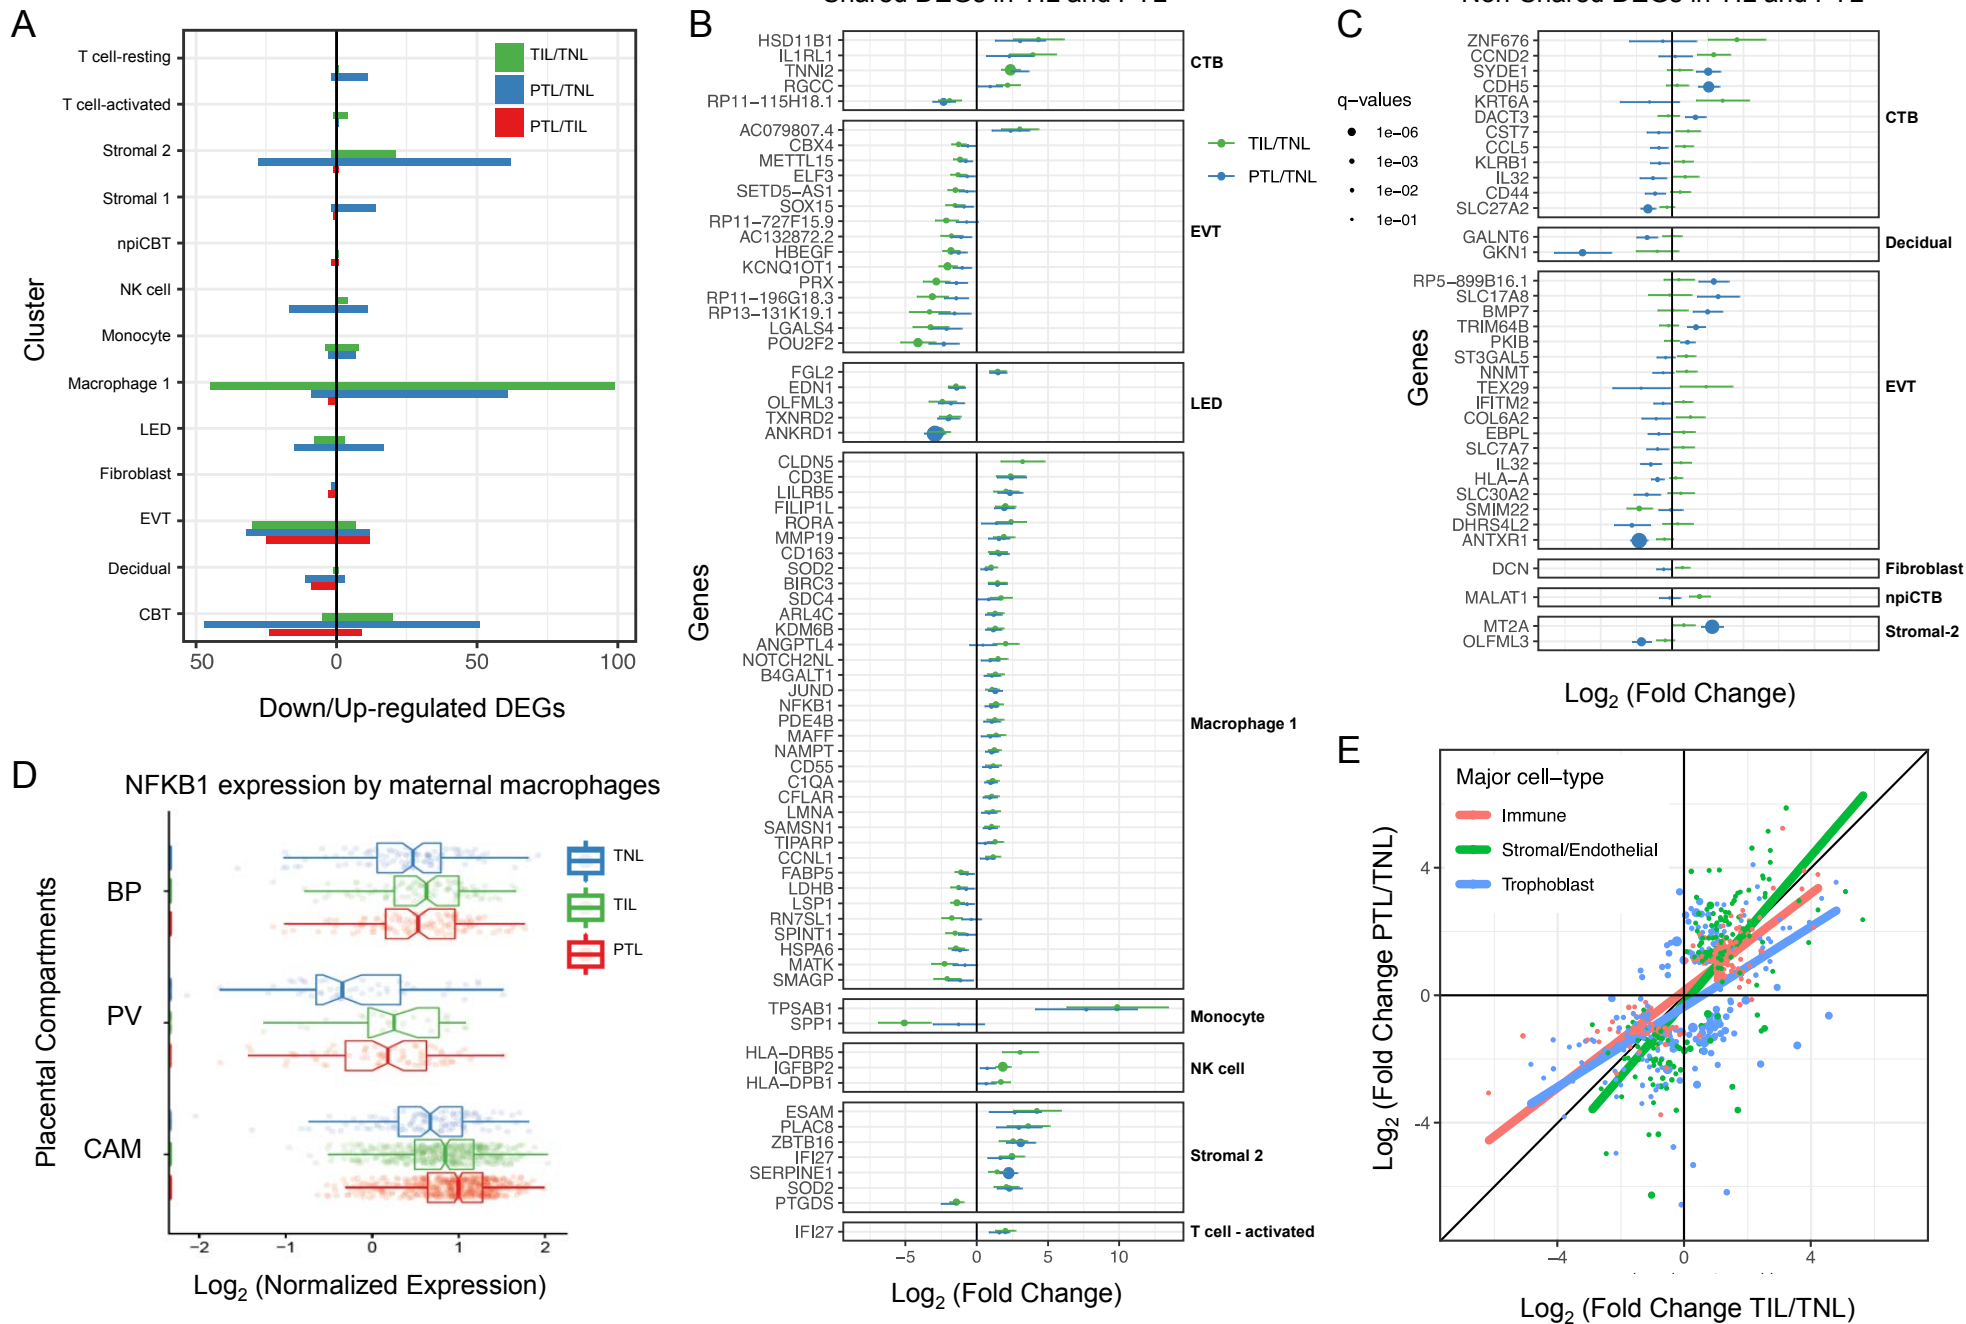



# FIGURE 4

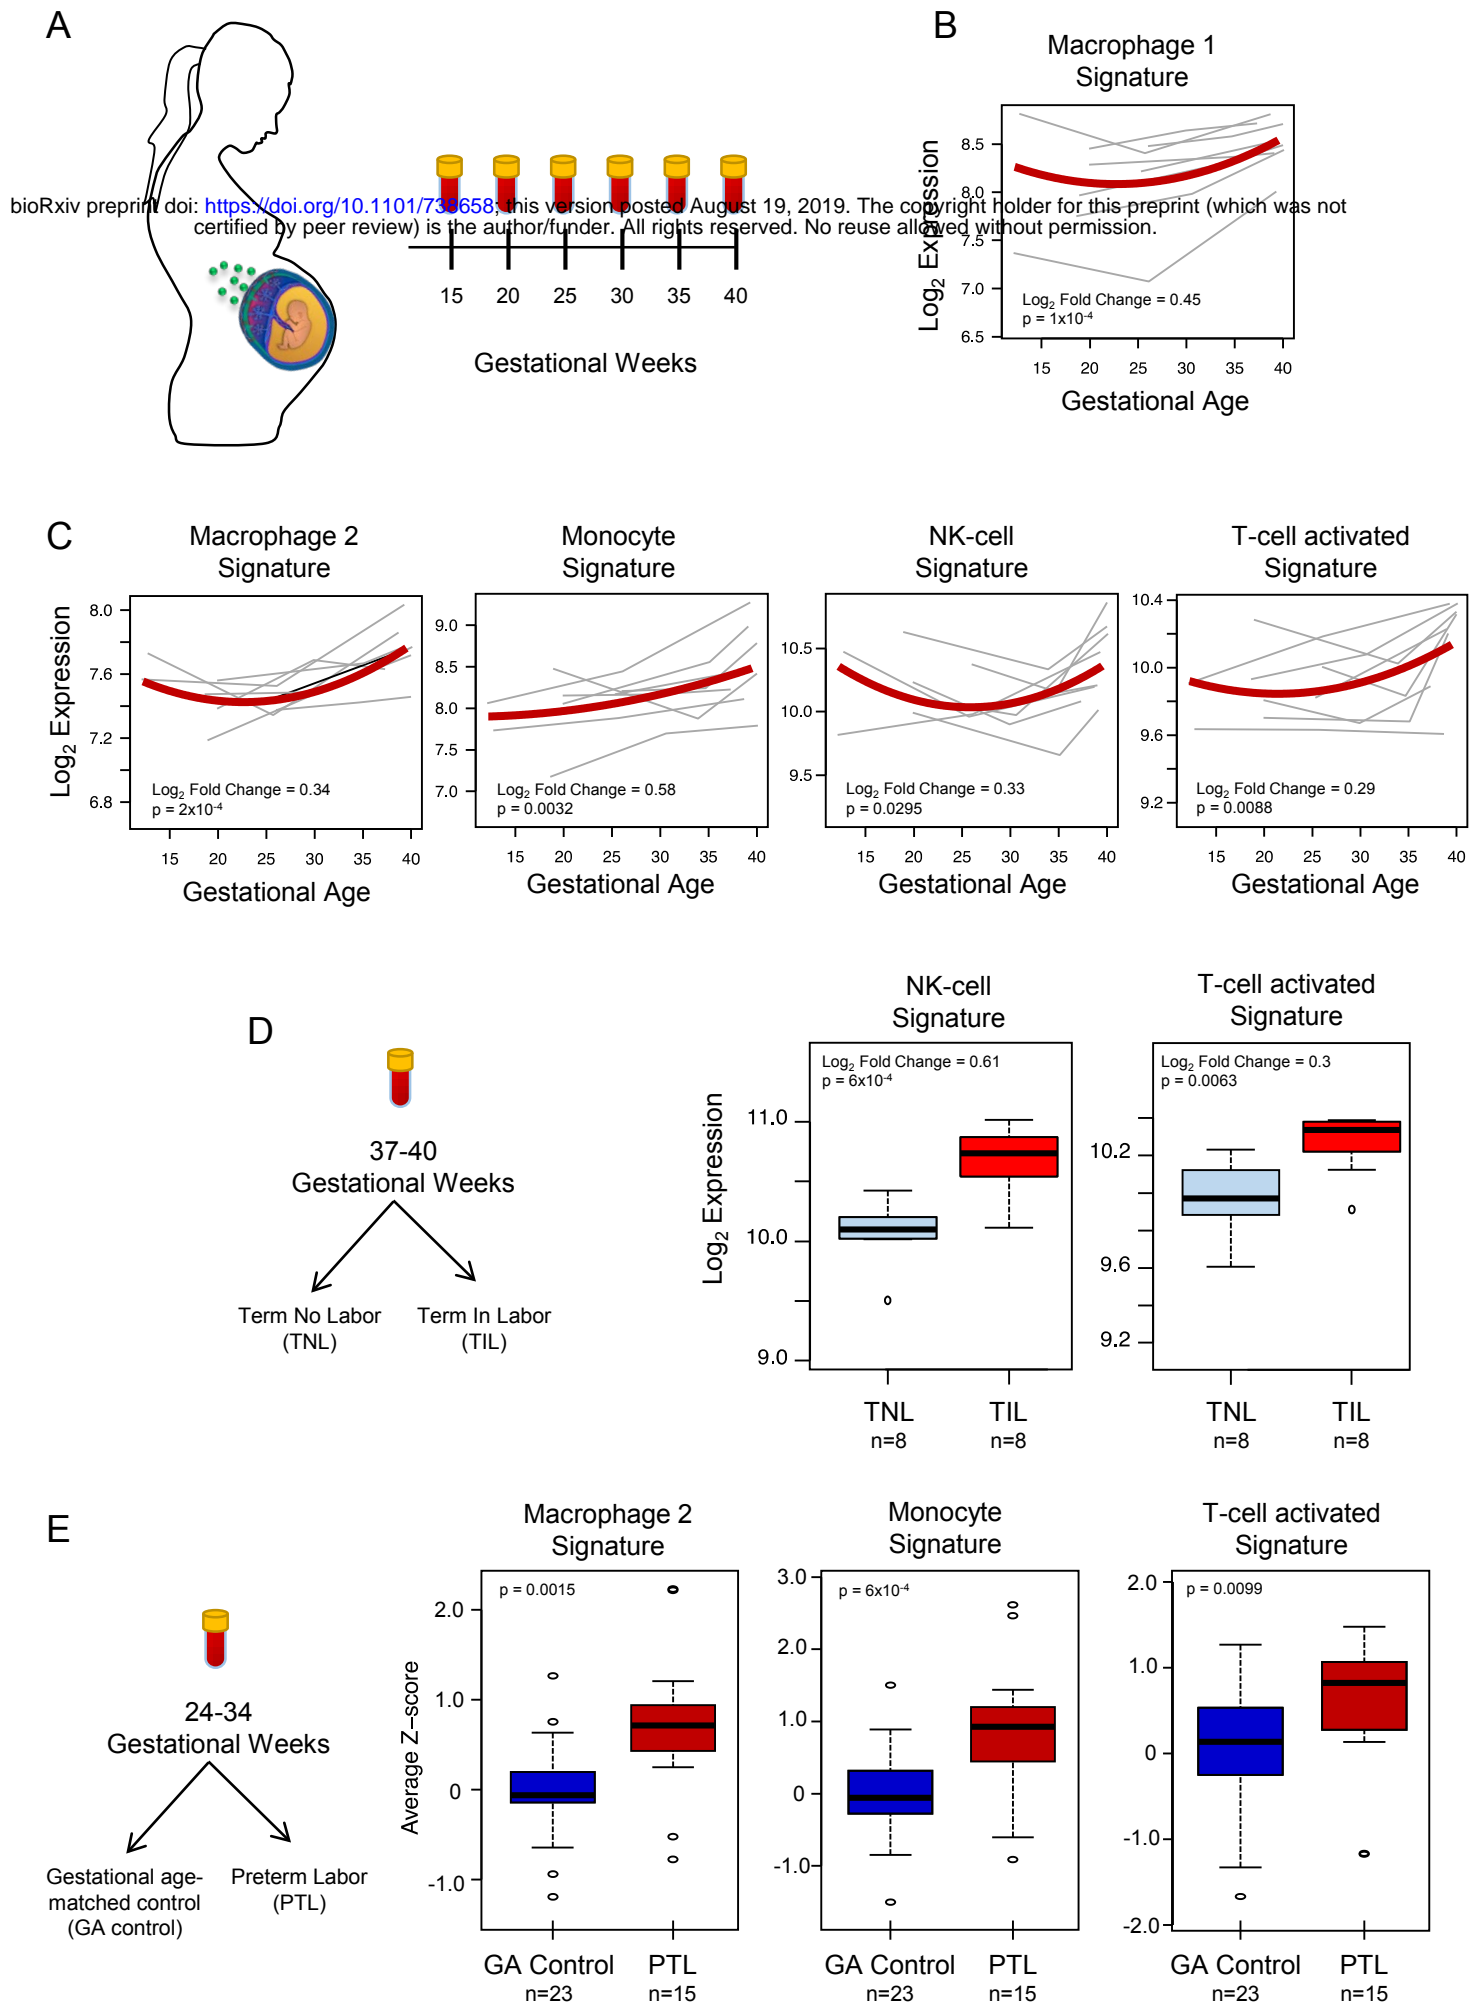

## 1 **Materials and Methods**

2

### 3 **Sample collection and processing, single-cell preparation, library preparation, and** 4 **sequencing**

5 Human subjects: Immediately after delivery, placental samples [the villi, basal plate  
6 (including the decidua basalis) and chorioamniotic membranes (including the decidua  
7 parietalis)] were collected from women with or without labor at term or preterm labor at  
8 the Detroit Medical Center, Wayne State University School of Medicine (Detroit, MI).  
9 Labor was defined by the presence of regular uterine contractions at a frequency of at  
10 least two contractions every 10 min with cervical changes resulting in delivery. Women  
11 with preterm labor delivered between 33-35 weeks of gestation whereas those with term  
12 labor delivered between 38-40 weeks of gestation (Table S6). The collection and use of  
13 human materials for research purposes were approved by the Institutional Review Boards  
14 of the Wayne State University School of Medicine. All participating women provided  
15 written informed consent prior to sample collection.

16

17 Single-cell preparation: Cells from placental villi, basal plate, and chorioamniotic  
18 membranes were isolated by enzymatic digestion, using previously described protocols  
19 with modifications<sup>23,69</sup>. Briefly, placental tissues were homogenized using a gentleMACS  
20 Dissociator (Miltenyi Biotec, San Diego, CA) either in an enzyme cocktail from the  
21 Umbilical Cord Dissociation Kit (Miltenyi Biotec) or in collagenase A (Sigma Aldrich, St.  
22 Louis, MO). After digestion, homogenized tissues were washed with ice-cold 1X  
23 phosphate-buffered saline (PBS) and filtered through a cell strainer (Fisher Scientific,

1 Durham, NC). Cell suspensions were then collected and centrifuged at 300 x g for 5 min.  
2 at 4°C. Red blood cells were lysed using a lysing buffer (Life Technologies, Grand Island,  
3 NY). Next, cells were washed with ice-cold 1X PBS and resuspended in 1X PBS for cell  
4 counting, which was performed using an automatic cell counter (Cellometer Auto 2000;  
5 Nexcelom Bioscience, Lawrence, MA). Lastly, dead cells were removed from the cell  
6 suspensions using the Dead Cell Removal Kit (Miltenyi Biotec) and cells were counted  
7 again using an automatic cell counter.

8

9 Single-cell preparation using the 10x Genomics platform: Viable cells were used for  
10 single-cell RNAseq library construction using the Chromium™ Controller and  
11 Chromium™ Single Cell 3' version 2 kit (10x Genomics, Pleasanton, CA), following the  
12 manufacturer's instructions. Briefly, viable cell suspensions were loaded into the  
13 Chromium™ Controller to generate gel beads in emulsion (GEM) with each GEM  
14 containing a single cell as well as barcoded oligonucleotides. Next, the GEMs were  
15 placed in the Veriti 96-well Thermal Cycler (Thermo Fisher Scientific, Wilmington, DE) and  
16 reverse transcription was performed in each GEM (GEM-RT). After the reaction, the  
17 complementary cDNA was cleaned using Silane DynaBeads (Thermo Fisher Scientific)  
18 and the SPRIselect Reagent kit (Beckman Coulter, Indianapolis, IN). Next, the cDNAs  
19 were amplified using the Veriti 96-well Thermal Cycler and cleaned using the SPRIselect  
20 Reagent kit. Indexed sequencing libraries were then constructed using the Chromium™  
21 Single Cell 3' version 2 kit, following the manufacturer's instructions.

22



1 Library preparation: cDNA was fragmented, end-repaired, and A-tailed using the  
2 Chromium™ Single Cell 3' version 2 kit, following the manufacturer's instructions. Next,  
3 adaptor ligation was performed using the Chromium™ Single Cell 3' version 2 kit followed  
4 by post-ligation cleanup using the SPRIselect Reagent kit to obtain the final library  
5 constructs, which were then amplified using PCR. After performing a post-sample index  
6 double-sided size selection using the SPRIselect Reagent kit, the quality and quantity of  
7 the DNA were analyzed using the Agilent Bioanalyzer High Sensitivity chip (Agilent  
8 Technologies, Wilmington, DE). The Kapa DNA Quantification Kit for Illumina® platforms  
9 (Kapa Biosystems, Wilmington, MA) was used to quantify the DNA libraries, following the  
10 manufacturer's instructions.

11  
12 Sequencing: Sequencing of the single-cell libraries was performed by NovoGene  
13 (Sacramento, CA) using the Illumina Platform (HiSeq X Ten System).

14  
15 **Immunofluorescence**  
16 Samples of chorioamniotic membranes, placenta villi, and decidua basal plate were  
17 embedded in Tissue-Tek Optimum Cutting Temperature (OCT) compound (Miles,  
18 Elkhart, IN) and snap-frozen in liquid nitrogen. Ten-µm-thick sections of each OCT-  
19 embedded tissue were cut using the Leica CM1950 (Leica Biosystems, Buffalo Grove,  
20 IL). Frozen slides were thawed to room temperature, fixed with 4% paraformaldehyde  
21 (Electron Microscopy Sciences, Hatfield, PA), and washed with 1X PBS. Non-specific  
22 background signals were blocked using Image-iT FX Signal Enhancer (Life Technologies)  
23 followed by blocking with antibody diluent/blocker (Perkin Elmer, Waltham, MA) for 30

1 min. at room temperature. Slides were then incubated with the rabbit anti-LYVE-1  
2 antibody (Novus Biologicals, Centennial, CO) and the Flex mouse anti-human CD31  
3 antibody (clone JC70A, Dako North America, Carpinteria, CA) for 90 min. at room  
4 temperature. Following washing with 1X PBS and blocking with 10% goat serum  
5 (SeraCare, Milford, MA), the slides were incubated with secondary goat anti-rabbit IgG–  
6 Alexa Fluor 594 (Life Technologies) and goat anti-mouse IgG–Alexa Fluor 488 (Life  
7 Technologies) for 30 min. at room temperature. Finally, the slides were washed and  
8 coverslips were mounted using ProLong Gold Antifade Mountant with DAPI (Life  
9 Technologies). Immunofluorescence was visualized using a confocal fluorescence  
10 microscope (Zeiss LSM 780; Carl Zeiss Microscopy GmbH, Jena, Germany) at the  
11 Microscopy, Imaging, and Cytometry Resources Core at the Wayne State University  
12 School of Medicine. Tile scans were performed from the chorioamniotic membranes,  
13 placental villi, and basal plate and the complete imaging fields were divided into six-by-  
14 six quadrants.

15

## 16 **scRNA-seq data analyses**

17 Raw fastq files obtained from Novogene were processed using Cell Ranger version 2.1.1  
18 from 10X Genomics. First, sequence reads for each library (sample) were aligned to the  
19 hg19 reference genome using the STAR<sup>70</sup> aligner, and expression of gene transcripts  
20 documented in the ENSEMBL database (Build 82) were determined for each cell. Gene  
21 expression was determined by the number of unique molecular identifiers (UMI) observed  
22 per gene. Second, data were aggregated and down-sampled to take into account  
23 differences in sequencing depth across libraries using Cell Ranger Aggregate to obtain

1 gene by cell expression data. Third, Seurat<sup>27</sup> was used to further clean and normalize the  
2 data. Then, only data from cells with a minimum of 200 detected genes, and from genes  
3 expressed in at least 10 cells were retained. Cells expressing mitochondrial genes at a  
4 level of >10% of total gene counts were also excluded, resulting in 77,906 cells and  
5 25,803 genes (summary in Table S1). Gene read counts were normalized with the Seurat  
6 “NormalizeData” function (normalization.method = LogNormalize, scale.factor = 10,000).  
7 Genes showing significant variation across cells were selected based on “LogVMR”  
8 dispersion function and “FindVariableGenes”. Ribosomal (“RP”) and mitochondrial (“MT”)  
9 genes were next removed, yielding 3,147 highly variable genes which were subsequently  
10 analyzed using Seurat “RunPCA” function to obtain the first 20 principal components.  
11 Clustering was done using Seurat “FindClusters” function based on the 20 PCAs  
12 (resolution of 0.7). Visualization of the cells was performed using Uniform Manifold  
13 Approximation and Projection for Dimension Reduction (UMAP) algorithm as  
14 implemented by the Seurat “runUMAP” function and using the first 20 principal  
15 components.

16

17 Assigning cell type identity to single-cell clusters: Multiple methods were utilized to assign  
18 identities to derived cell clusters. The xCell (<http://xcell.ucsf.edu/#>)<sup>71</sup> tool was used to  
19 compare the expression signatures of the initial 23 clusters with those of known cell types  
20 (n=64, including immune, endothelial, and stromal cells). Marker genes showing distinct  
21 expression in individual cell clusters compared to all others were identified using the  
22 Seurat FindAllMarkers function with default parameters. Marker genes with significant  
23 specificity to each cluster were compared to those reported elsewhere<sup>23,24</sup>.

1  
2 Identification of cell-type maternal/fetal origin: We used two complementary approaches  
3 to determine the maternal/fetal origin of each cell-type. First, we used the samples derived  
4 from pregnancies where the neonate was male (3/9 cases, 8/25 samples) and we derived  
5 a fetal index based on the sum of all the reads mapping to genes on the Y chromosome  
6 relative to the total number of reads mapping to genes on the autosomes (Figure S4).  
7 The second method was based on the cell specific genotypes derived from the scRNA-  
8 seq read data and were overlapped to known genetic variants from the 1000 Genomes  
9 reference panel using the demuxlet and freemuxlet approach implemented in popscl<sup>72</sup>  
10 (see Figure 1E), software available at <https://github.com/statgen/popscl/>.

11  
12 Differential gene expression: To identify genes differentially expressed among locations  
13 (independent of study group), we created a pseudo-bulk aggregate of all the cells of the  
14 same cell-type. Only cell types with a minimum of 100 cell in each location were  
15 considered in this analysis. Differences in cell type specific expression were estimated  
16 using negative binomial models implemented in DESeq2<sup>73</sup>, including a fixed effect for  
17 each individual and location. The distribution of p-values for DEGs between pairs of  
18 compartments was assessed using a qq-plot to ensure the statistical models were well  
19 calibrated (Table S3). To detect DEGs across study groups we aggregated read counts  
20 across locations for each cell-type cluster, excluding cell-types with less than 100 cells in  
21 each study group (15 clusters). Differences in cell-type specific expression among study  
22 groups were estimated using negative binomial models implemented in Deseq2.

1 Differential gene expression was inferred based on FDR adjusted p-value (q-value <0.1)  
2 and fold change >2.0.

3

#### 4 **Gene ontology and pathway enrichment analyses**

5 The clusterProfiler<sup>74</sup> package in R was utilized for the identification and visualization of  
6 enriched pathways among differentially expressed genes identified as described above.  
7 The functions “enrichGO”, “enrichKEGG”, and “enrichPathway” were used to identify  
8 over-represented pathways based on the Gene Ontology (GO), KEGG, and Reactome  
9 databases, respectively. Similar enrichment analyses were also conducted using Gene  
10 Set Enrichment Analysis (GSEA)<sup>75</sup> which does not require selection of differentially  
11 expressed genes as a first step. Significance in all enrichment analyses were based on  
12  $q < 0.05$ .

13

#### 14 **Quantification of single-cell signatures in maternal whole blood mRNA**

15 *Analysis of transcriptional signatures with advancing gestation and with labor at term:*  
16 Whole-blood samples collected longitudinally (12 to 40 weeks of gestation) from women  
17 with a normal pregnancy who delivered at term with (TIL) (n=8) or without (TNL) (n=8)  
18 spontaneous labor, were profiled using DriverMap™ and RNA-Seq as previously  
19 described<sup>58</sup>. The log<sub>2</sub> normalized read counts were averaged over the top genes (up to  
20 20, ranked by decreasing fold change) distinguishing each cluster from all others as  
21 described above (single-cell signature). Whole blood single-cell signature expression in  
22 patients with three longitudinal samples was modeled using linear mixed-effects models  
23 with quadratic splines in order to assess the significance of changes with gestational age.

1 Differences in single-cell signature expression associated with labor at term (TIL vs. TNL)  
2 were assessed using two-tailed equal variance t-tests. In both analyses, adjustment for  
3 multiple signature testing was performed using the false discovery rate method, with  
4  $q < 0.1$  being considered significant.

5

6 *Analysis of transcriptional signatures in preterm labor:* Whole blood gene expression data  
7 from samples collected at 24-34 weeks of gestation were profiled by RNA-Seq as  
8 previously described<sup>59</sup>. The study included samples from 15 women with preterm labor  
9 who delivered preterm, and 23 gestational age matched controls. Log<sub>2</sub> transformed  
10 pseudo read count data were next transformed into Z-scores based on mean and  
11 standard deviation estimated in the control group. Single cell signatures were quantified  
12 as the average of Z-scores of member genes and compared between groups using a two-  
13 tailed Wilcoxon test. Adjustment for multiple signature testing was performed using the  
14 false discovery rate method, with  $q < 0.1$  being considered a significant result.
